# Supplementary material
Source: PubMed Central journal article supplement (PMC9478154)
Supplement: 41396_2022_1278_MOESM1_ESM.pdf [file 41396_2022_1278_MOESM1_ESM.pdf]

# Supplementary Information

## Growth Rate-Dependent Coordination of Catabolism and Anabolism in the Archaeon *Methanococcus maripaludis* under Phosphate Limitation

Wenyu Gu<sup>a\*</sup>, Albert L. Müller<sup>a\*</sup>, Jörg S. Deutzmann<sup>a</sup>, James R. Williamson<sup>b</sup>, & Alfred M. Spormann<sup>a,c</sup>

<sup>a</sup> Department of Civil and Environmental Engineering, Stanford University, Stanford, USA

<sup>b</sup> Department of Integrative Structural and Computational Biology, Department of Chemistry, the Skaggs Institute for Chemical Biology, the Scripps Research Institute, La Jolla, USA

<sup>c</sup> Department of Chemical Engineering, Stanford University, Stanford, CA, USA

Correspondence: AM Spormann, Departments of Chemical Engineering, and of Civil and Environmental Engineering, Stanford University, Stanford, USA

Email: [spormann@stanford.edu](mailto:spormann@stanford.edu)

**\* These authors contributed equally to this work.**

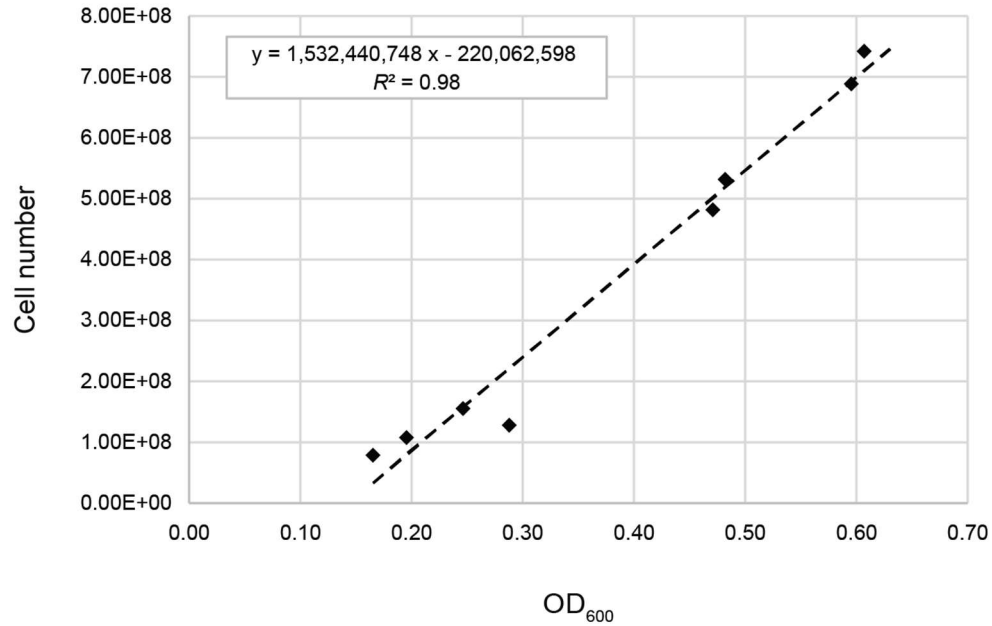

**Figure S1. Calibration of cell density versus cell number.** OD<sub>600</sub> measurements correlated linearly to cell number determined by counting  $\geq 1,000$  cells using a Petroff-Hausser Counting Chamber and the resulting calibration curve ( $y = 1,532,440,748 x - 220,062,598$ ,  $R^2 = 0.98$ ) was used for conversion.

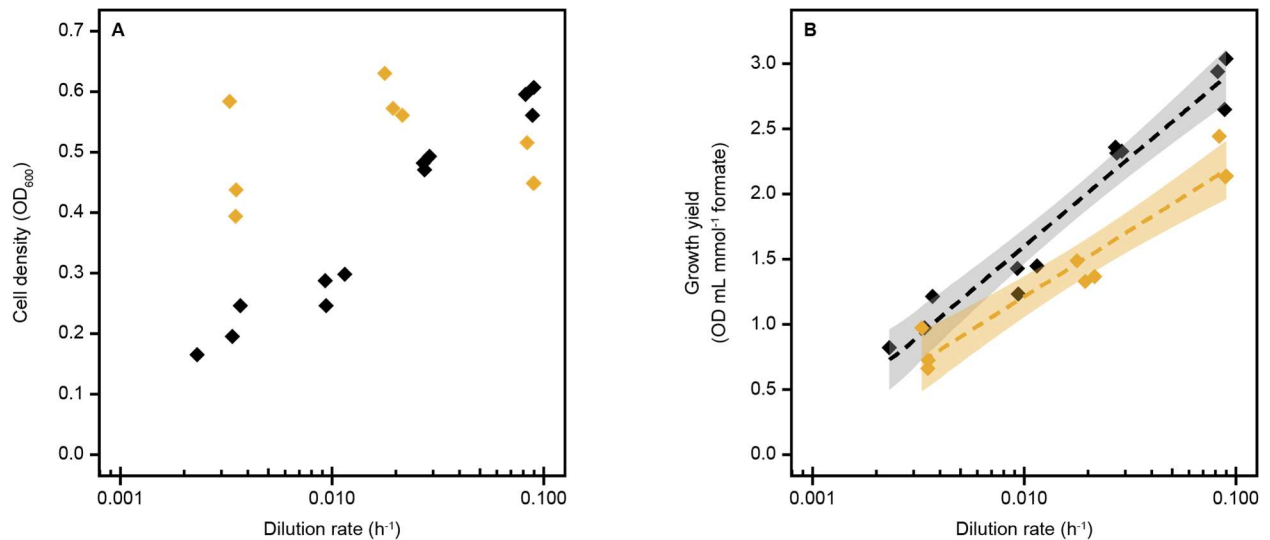

**Figure S2. Cell density and growth yield of *M. maripaludis*.** (A) OD<sub>600</sub> values at different growth rates under phosphate-limited (gold, this study) and formate-limited (black, [1]) conditions. Due to decreasing yield at slower growth rates, additional formate in form of formic acid was added to slower growth rates of phosphate-limited cells (total concentrations: 200 mM at fast, 400 mM at intermediate, and 600 mM at

slow growth rates) in order to keep cell densities above the threshold where cells would become formate- instead of phosphate-limited. (B) Apparent molar growth yields of *M. maripaludis* cells on formate correlated logarithmically with dilution rate under both phosphate-limited (gold,  $y = 0.15\ln(x) + 1.11$ ,  $R^2 = 0.93$ ,  $p < 0.01$ , this study) and formate-limited (black,  $y = 0.20\ln(x) + 1.47$ ,  $R^2 = 0.95$ ,  $p < 0.01$ , [1]) conditions. Shaded areas depict 95% confidence intervals.

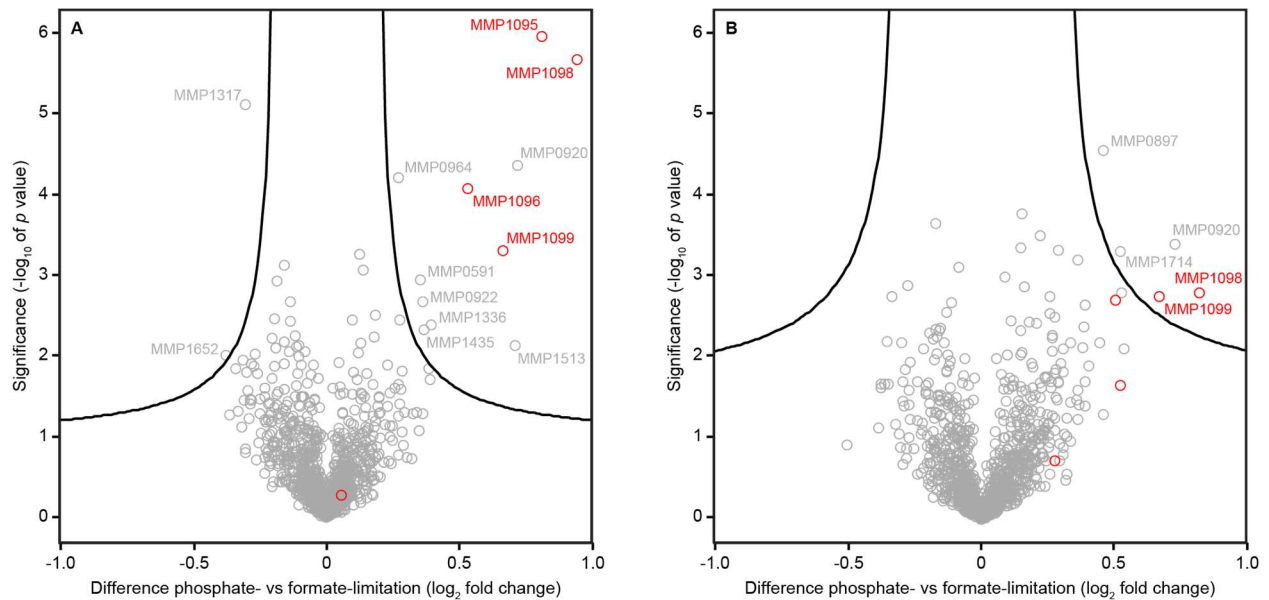

**Figure S3.** Comparison of protein expression of *M. maripaludis* under formate vs. phosphate limitation at fast growth rates (A) and at very slow growth rates (B). Scatter plots show log<sub>2</sub>-fold changes and -log<sub>10</sub> p values from two-sided Student's t-test comparisons. Proteins above the black line are significantly enriched under phosphate- (top right) or formate-limited (top left) conditions using a false discovery rate of 0.05 and S0 of 0.1 as cutoff. Proteins of the phosphate uptake operon *pst* (red circles) are generally upregulated under phosphate-limited conditions. A) Comparison of average mass fraction of samples run at fast (between 0.082 and 0.090 h<sup>-1</sup>) dilution rates under phosphate limitation (P-F1, P-F2, P-F3) with samples run under formate limitation (F1, F2, F3, [1]). B) Comparison of average mass fraction of samples run at very slow (between 0.002 and 0.004 h<sup>-1</sup>) dilution rates under phosphate limitation (P-XS1, P-XS2, P-XS3) with samples run under formate limitation (XS1, XS2, XS3 [1]).

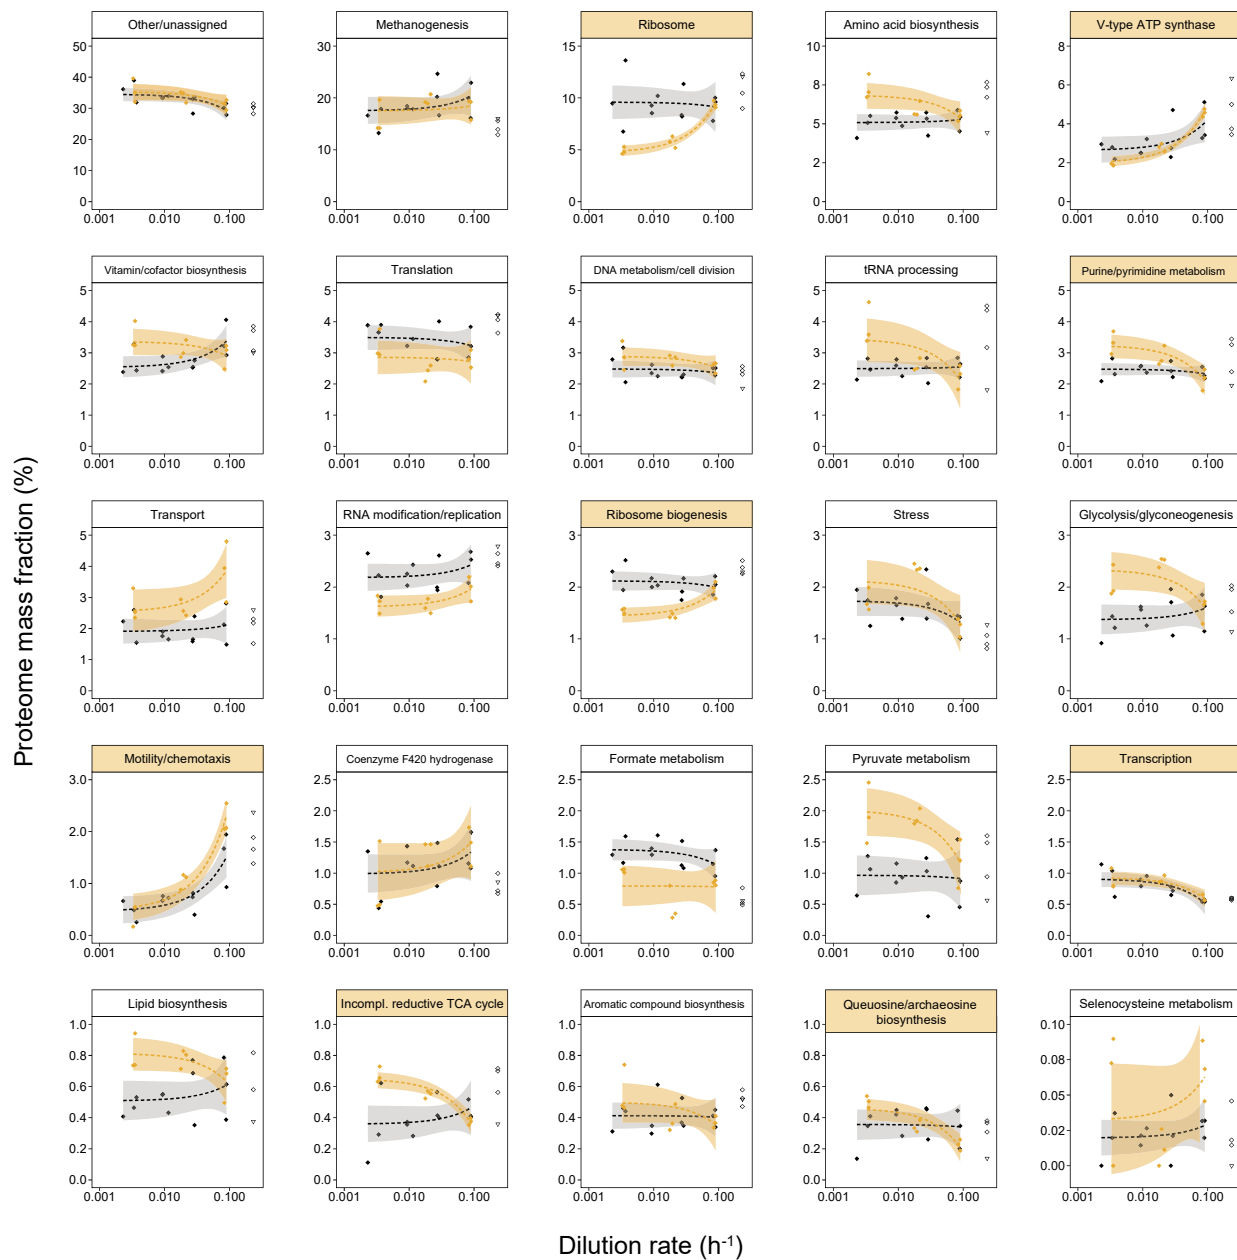

**Figure S4. Proteome allocation to functional sub-systems.** Mass fraction of total proteome is shown for phosphate-limited growth (gold diamonds, this study) with data under formate limitation shown as a reference (black diamonds, [1]). Sectors with significant growth rate dependence (significantly non-zero slope of linear regression,  $p < 0.05$  after correction for multiple comparisons) under phosphate-limited conditions are highlighted in gold. Results from an exponential phase batch culture sample are shown (open symbols), but not used for regression analysis. Shaded areas depict 95% confidence intervals.

### Sampled from run P-13 ("intermediate", 0.021 h<sup>-1</sup>)

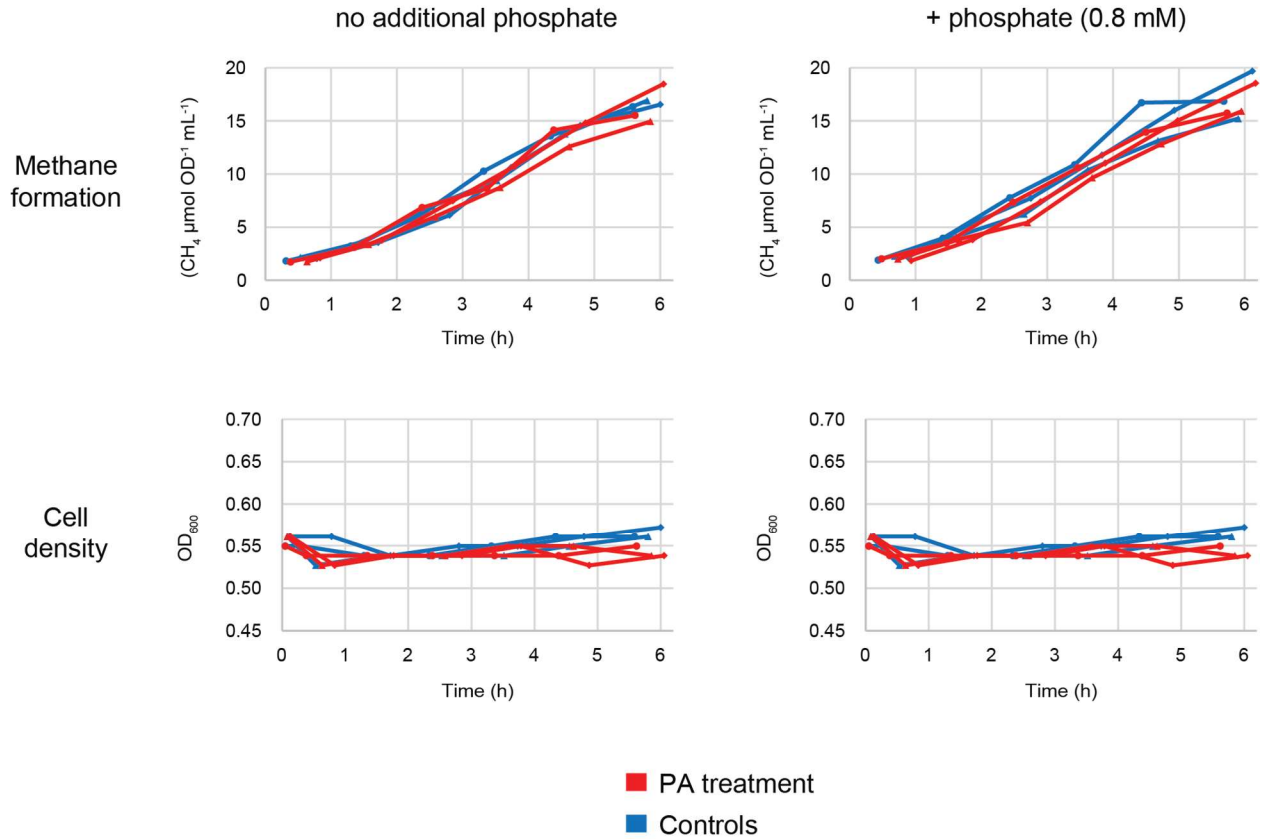

**Figure S5.** Cells grown in continuous culture were transferred to anoxic Hungate tubes with 150 mM sodium formate, 1 mM sodium sulfide, as well as 0.8 mM K<sub>2</sub>HPO<sub>4</sub> and/or 5 μg mL<sup>-1</sup> translation inhibitor pseudomonic acid (PA) when indicated. Upper panel shows specific methane production rate as the slopes of methane accumulation (per OD<sub>600</sub>) during the first 6h after formate addition. Lower panel showed cell density (OD<sub>600</sub>) during the same time frame. The data shows that cells are phosphate limited - phosphate addition allowed cells to grow, but did not influence methane production rate.

**Table S1. Individual proteins with significant correlation with growth rate, ordered by slope of the linear regression.**

| Locus   | Annotation (Uniprot)                                  | Assigned functional subsystem | Regression |                        | <i>p</i> value (adjusted) | Mass fraction |                        |
|---------|-------------------------------------------------------|-------------------------------|------------|------------------------|---------------------------|---------------|------------------------|
|         |                                                       |                               | Slope      | <i>SE</i> <sup>1</sup> |                           | average       | <i>SD</i> <sup>2</sup> |
| MMP1403 | 50S ribosomal protein L22                             | Ribosome                      | 0.302      | 0.044                  | 0.011                     | 0.08%         | 0.03%                  |
| MMP0258 | 50S ribosomal protein L12                             | Ribosome                      | 0.239      | 0.026                  | 0.004                     | 0.81%         | 0.55%                  |
| MMP1433 | 50S ribosomal protein L11                             | Ribosome                      | 0.220      | 0.046                  | 0.048                     | 0.22%         | 0.05%                  |
| MMP1045 | V-type ATP synthase subunit B                         | V-type ATP synthase           | 0.202      | 0.028                  | 0.010                     | 0.79%         | 0.19%                  |
| MMP1404 | 30S ribosomal protein S3                              | Ribosome                      | 0.176      | 0.028                  | 0.013                     | 0.27%         | 0.09%                  |
| MMP1415 | 50S ribosomal protein L6                              | Ribosome                      | 0.171      | 0.026                  | 0.011                     | 0.20%         | 0.04%                  |
| MMP1325 | 30S ribosomal protein S9                              | Ribosome                      | 0.170      | 0.037                  | 0.049                     | 0.06%         | 0.02%                  |
| MMP0163 | Putative arsenical pump-driving ATPase                | Stress                        | 0.166      | 0.030                  | 0.023                     | 0.23%         | 0.07%                  |
| MMP0447 | Nitrogenase related protein                           | Other/unassigned              | 0.161      | 0.031                  | 0.032                     | 0.04%         | 0.02%                  |
| MMP1042 | V-type ATP synthase subunit C                         | V-type ATP synthase           | 0.151      | 0.020                  | 0.008                     | 0.46%         | 0.30%                  |
| MMP1412 | 50S ribosomal protein L5                              | Ribosome                      | 0.144      | 0.012                  | 0.001                     | 0.15%         | 0.02%                  |
| MMP1418 | 50S ribosomal protein L18                             | Ribosome                      | 0.134      | 0.028                  | 0.045                     | 0.13%         | 0.04%                  |
| MMP1044 | V-type ATP synthase subunit A                         | V-type ATP synthase           | 0.129      | 0.011                  | 0.001                     | 0.96%         | 0.26%                  |
| MMP1640 | S-adenosylmethionine synthase                         | Amino acid biosynthesis       | 0.129      | 0.014                  | 0.004                     | 0.26%         | 0.08%                  |
| MMP1543 | 50S ribosomal protein L3                              | Ribosome                      | 0.127      | 0.022                  | 0.021                     | 0.31%         | 0.11%                  |
| MMP0975 | Molybdate ABC transporter substrate-binding protein   | Vitamin/cofactor biosynthesis | 0.112      | 0.018                  | 0.014                     | 0.24%         | 0.18%                  |
| MMP1046 | V-type ATP synthase subunit D                         | V-type ATP synthase           | 0.105      | 0.021                  | 0.043                     | 0.17%         | 0.05%                  |
| MMP1319 | 30S ribosomal protein S13                             | Ribosome                      | 0.092      | 0.014                  | 0.011                     | 0.16%         | 0.05%                  |
| MMP1054 | Heterodisulfide reductase subunit C2                  | Methanogenesis                | 0.088      | 0.012                  | 0.008                     | 0.20%         | 0.08%                  |
| MMP0625 | 50S ribosomal protein L14e                            | Ribosome                      | 0.077      | 0.012                  | 0.013                     | 0.06%         | 0.03%                  |
| MMP1249 | Formylmethanofuran dehydrogenase subunit C            | Methanogenesis                | 0.058      | 0.012                  | 0.048                     | 0.27%         | 0.10%                  |
| MMP1666 | Flagellin                                             | Motility/chemotaxis           | 0.053      | 0.010                  | 0.038                     | 0.08%         | 0.06%                  |
| MMP1671 | Flagella accessory protein E                          | Motility/chemotaxis           | 0.053      | 0.007                  | 0.008                     | 0.16%         | 0.11%                  |
| MMP1563 | Tetrahydromethanopterin S-methyltransferase subunit B | Methanogenesis                | 0.048      | 0.010                  | 0.049                     | 0.20%         | 0.13%                  |
| MMP1190 | Peptidyl-prolyl cis-trans isomerase                   | Vitamin/cofactor biosynthesis | 0.048      | 0.005                  | 0.004                     | 0.07%         | 0.02%                  |
| MMP1670 | Flagella accessory protein D                          | Motility/chemotaxis           | 0.038      | 0.006                  | 0.012                     | 0.33%         | 0.16%                  |
| MMP1667 | Flagellin                                             | Motility/chemotaxis           | 0.015      | 0.002                  | 0.011                     | 0.04%         | 0.06%                  |
| MMP0887 | Uncharacterized protein                               | Other/unassigned              | -0.124     | 0.007                  | 0.002                     | 0.02%         | 0.01%                  |
| MMP1347 | Archaeal histone B                                    | Other/unassigned              | -0.159     | 0.034                  | 0.049                     | 0.25%         | 0.04%                  |

<sup>1</sup> Standard error

<sup>2</sup> Standard deviation

**Dataset S1** (separate file). Collection of data accompanying chemostat experiments at different growth rates.

**Dataset S2** (separate file). Overview of functional classification of *M. maripaludis* proteins, relative mass fraction data of protein abundance determined by spectral counting, and relative quantification against a <sup>15</sup>N labeled reference.

## References

- [1] Müller AL, Gu W, Patsalo V, Deutzmann JS, Williamson JR, Spormann AM. An alternative resource allocation strategy in the chemolithoautotrophic archaeon *Methanococcus maripaludis*. *Proc Natl Acad Sci U S A* 2021; 118: 1–8.
